# Supplementary material for: Different responses to anti-programmed cell death protein 1 (PD-1) immunotherapy in a patient with Lynch syndrome and metachronous urothelial and colon cancer: A case report
Source: PubMed Central journal article supplement — Oncol Lett. 2019 Sep 23;18(5):5085–90. doi: 10.3892/ol.2019.10909 (PMC6781514; doi:10.3892/ol.2019.10909), 2019-09-23
Supplement: Supplementary_Data.pdf [file Supplementary_Data.pdf]

Table SI. Somatic mutations detected by next-generation sequencing.

| Gene           | c.HGVS         | p.HGVS   | Allele Frequency (%) |
|----------------|----------------|----------|----------------------|
| <i>HRAS</i>    | c.37G>A        | p.G13S   | 12.9                 |
| <i>GAB2</i>    | c.1240C>T      | p.R414C  | 12.7                 |
| <i>JAK3</i>    | c.349C>T       | p.R117C  | 12.3                 |
| <i>ALK</i>     | c.979G>A       | p.A327T  | 12.0                 |
| <i>ALK</i>     | c.2081A>G      | p.H694R  | 11.4                 |
| <i>EGFR</i>    | c.2006G>A      | p.R669Q  | 11.1                 |
| <i>NTRK3</i>   | c.1990G>A      | p.A664T  | 10.5                 |
| <i>PTCH2</i>   | c.359G>A       | p.R120H  | 10.3                 |
| <i>NOTCH4</i>  | c.2155A>G      | p.T719A  | 9.9                  |
| <i>FGFR3</i>   | c.742C>T       | p.R248C  | 9.7                  |
| <i>ATM</i>     | c.748C>T       | p.R250*  | 9.4                  |
| <i>RHOA</i>    | c.56C>T        | p.T19I   | 9.1                  |
| <i>RHOA</i>    | c.139G>A       | p.E47K   | 9.0                  |
| <i>NOTCH3</i>  | c.4822G>A      | p.A1608T | 8.6                  |
| <i>SRC</i>     | c.100G>A       | p.A34T   | 4.4                  |
| <i>MSH6</i>    | c.2195G>A      | p.R732Q  | 4.0                  |
| <i>APC</i>     | c.4150T[3>4]   | p.S1385* | 4.0                  |
| <i>NOTCH4</i>  | c.4415G>A      | p.R1472Q | 3.9                  |
| <i>AKT1</i>    | c.226C>T       | p.R76C   | 3.9                  |
| <i>SMARCB1</i> | c.641C>T       | p.T214M  | 3.7                  |
| <i>APC</i>     | c.646C>T       | p.R216*  | 3.7                  |
| <i>CTNNB1</i>  | c.1693C>T      | p.R565C  | 3.5                  |
| <i>TERT</i>    | c.-58-u4351C>T | -        | 2.9                  |
| <i>ERG</i>     | c.881G>A       | p.R294H  | 2.9                  |
| <i>SMARCA4</i> | c.4772G>A      | p.R1591Q | 2.4                  |
| <i>PIK3CA</i>  | c.1849C>T      | p.R617W  | 2.0                  |
| <i>NRAS</i>    | c.34G>T        | p.G12C   | 1.9                  |
| <i>PDGFRB</i>  | c.3074T>C      | p.L1025P | 1.6                  |
| <i>NOTCH1</i>  | c.4672G>A      | p.G1558R | 1.4                  |
| <i>CSF1R</i>   | c.431G>A       | p.R144H  | 1.3                  |
| <i>IRS2</i>    | c.974A>G       | p.H325R  | 1.2                  |
| <i>IRS2</i>    | c.3809C>A      | p.P1270Q | 1.0                  |
| <i>TERT</i>    | c.-58-u2855C>T | -        | 0.9                  |
| <i>ATR</i>     | c.7792C>T      | p.R2598* | 0.8                  |
| <i>NOTCH1</i>  | c.2474C>T      | p.T825M  | 0.8                  |
| <i>ERG</i>     | c.475C>A       | p.L159I  | 0.8                  |
| <i>MED12</i>   | c.4820A>G      | p.E1607G | 0.8                  |
| <i>MTOR</i>    | c.3901C>T      | p.R1301C | 0.7                  |
| <i>IL7R</i>    | c.616C>T       | p.R206*  | 0.7                  |
| <i>CDK13</i>   | c.895G>A       | p.A299T  | 0.7                  |
| <i>TSC1</i>    | c.1700C>T      | p.A567V  | 0.5                  |
| <i>MLL</i>     | c.2521C>T      | p.P841S  | 0.5                  |
| <i>CDK12</i>   | c.3721C>T      | p.P1241S | 0.5                  |

-, c.-58-u4351C>T and c.-58-u2855C>T occur on the promoter region of the telomerase reverse transcriptase gene, and the amino acid change cannot be predicted; \*, stop codon in a nonsense variant.
